# Supplementary material for: A microfluidic droplet generator based on a piezoelectric actuator
Source: Royal Society of Chemistry journal article supplement (doi:10.1039/b814810d), 2008-11-21
Supplement: b814810d.pdf [file b814810d.pdf]

Supplementary information

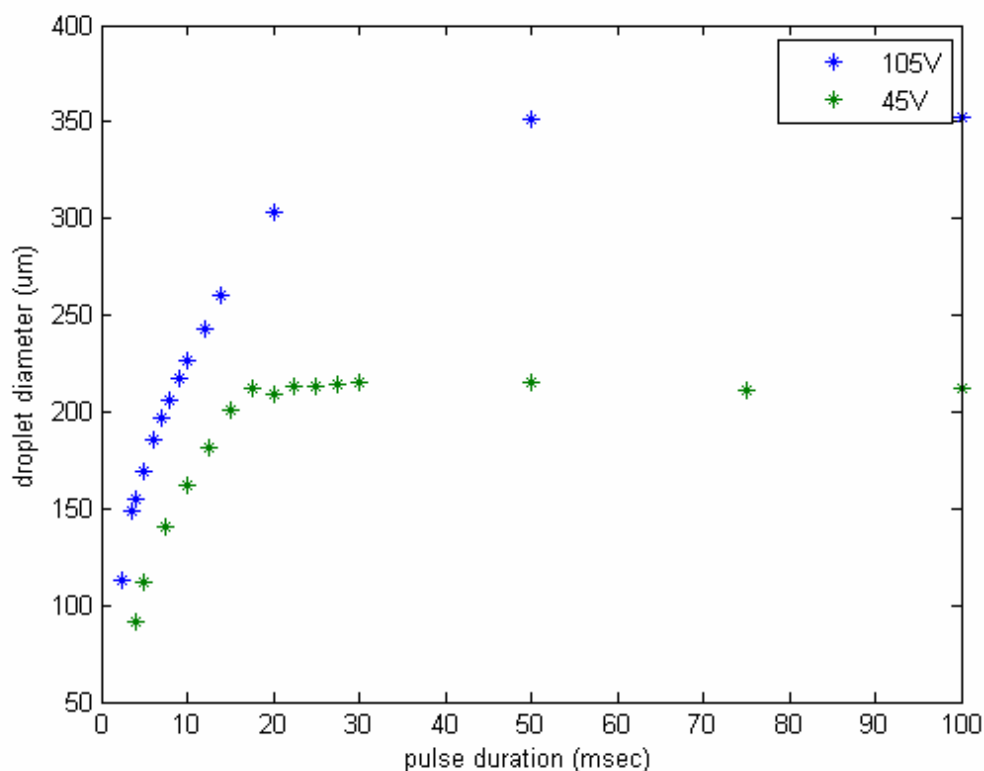

**S1:** A plot of the mean droplet diameter versus pulse duration as obtained by the cross flow configuration for two amplitudes of 45 and 105 V. The diameter increases rapidly with pulse duration until a critical value is reached whereupon droplet size remains constant.
